# Supplementary material for: Osmolarity-independent electrical cues guide rapid response to injury in zebrafish epidermis
Source: eLife journal article supplement (doi:10.7554/elife.62386), 2020-11-23
Supplement: supp [file elife-62386-supp-v1.zip]

**A**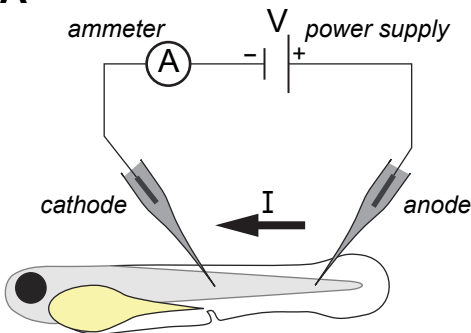

equiv. to

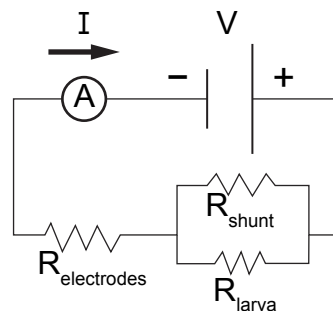

|                         |                      |
|-------------------------|----------------------|
| Directly measured       |                      |
| V                       | 0-55V                |
| I                       | 1 $\mu$ A            |
| $R_{\text{electrodes}}$ | 18.5 M $\Omega$      |
| Assumed                 |                      |
| $R_{\text{shunt}}$      | $\infty$             |
| Inferred                |                      |
| $R_{\text{larva}}$      | $\sim$ 11 M $\Omega$ |

**B**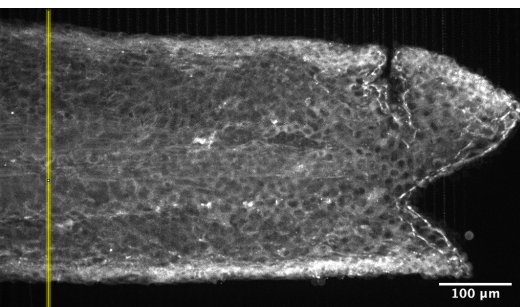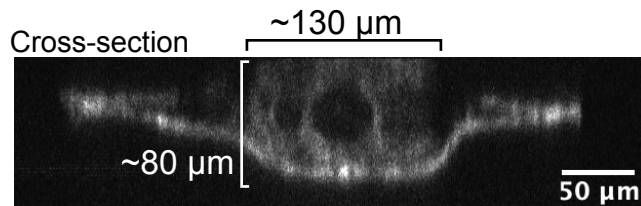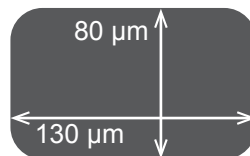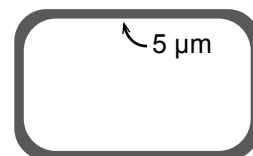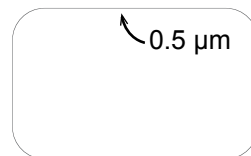

|                                  |                                 |                                   |                                    |
|----------------------------------|---------------------------------|-----------------------------------|------------------------------------|
| Current flows through:           | Full cross-section              | 5 $\mu$ m perimeter               | 0.5 $\mu$ m perimeter              |
| Area:                            | $1 \times 10^{-4} \text{ cm}^2$ | $0.2 \times 10^{-4} \text{ cm}^2$ | $0.02 \times 10^{-4} \text{ cm}^2$ |
| Current density (for 1 $\mu$ A): | 10 mA/cm $^2$                   | 50 mA/cm $^2$                     | 500 mA/cm $^2$                     |

**Figure 4 - figure supplement 1**
