# Supplementary figures and images for: Osmolarity-independent electrical cues guide rapid response to injury in zebrafish epidermis
Source: eLife journal article supplement (doi:10.7554/elife.62386), 2020-11-23

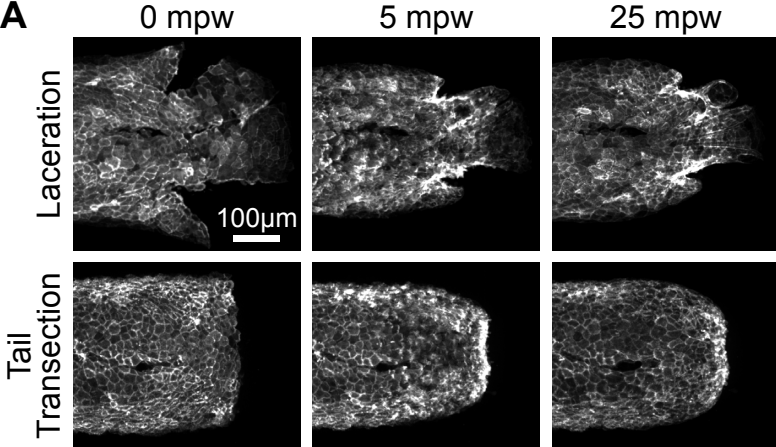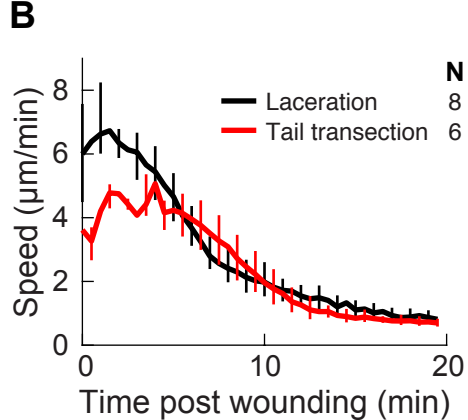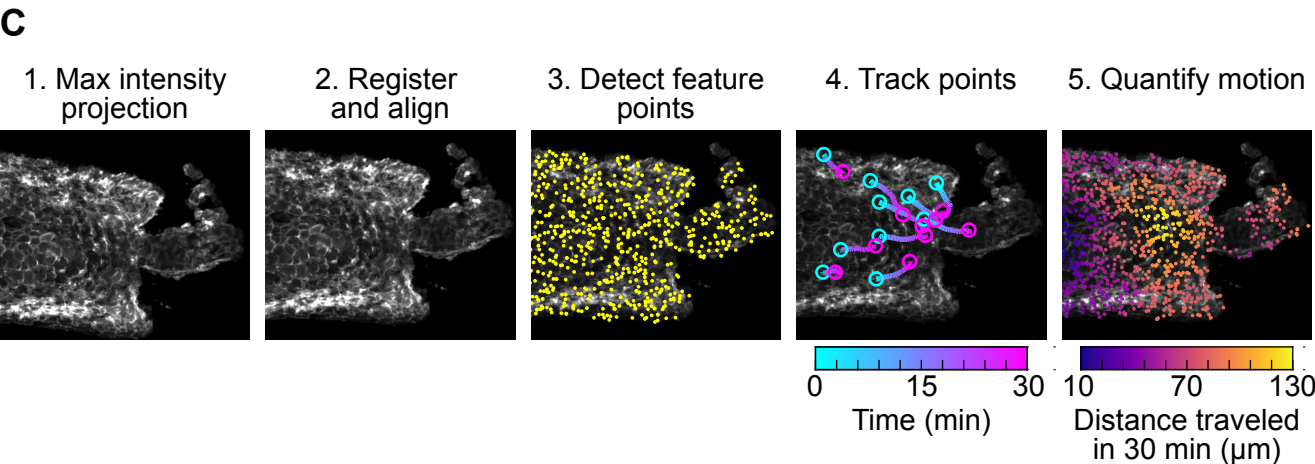

**Figure 1 - figure supplement 1**

Supplement: supp [file elife-62386-supp-v1.zip]

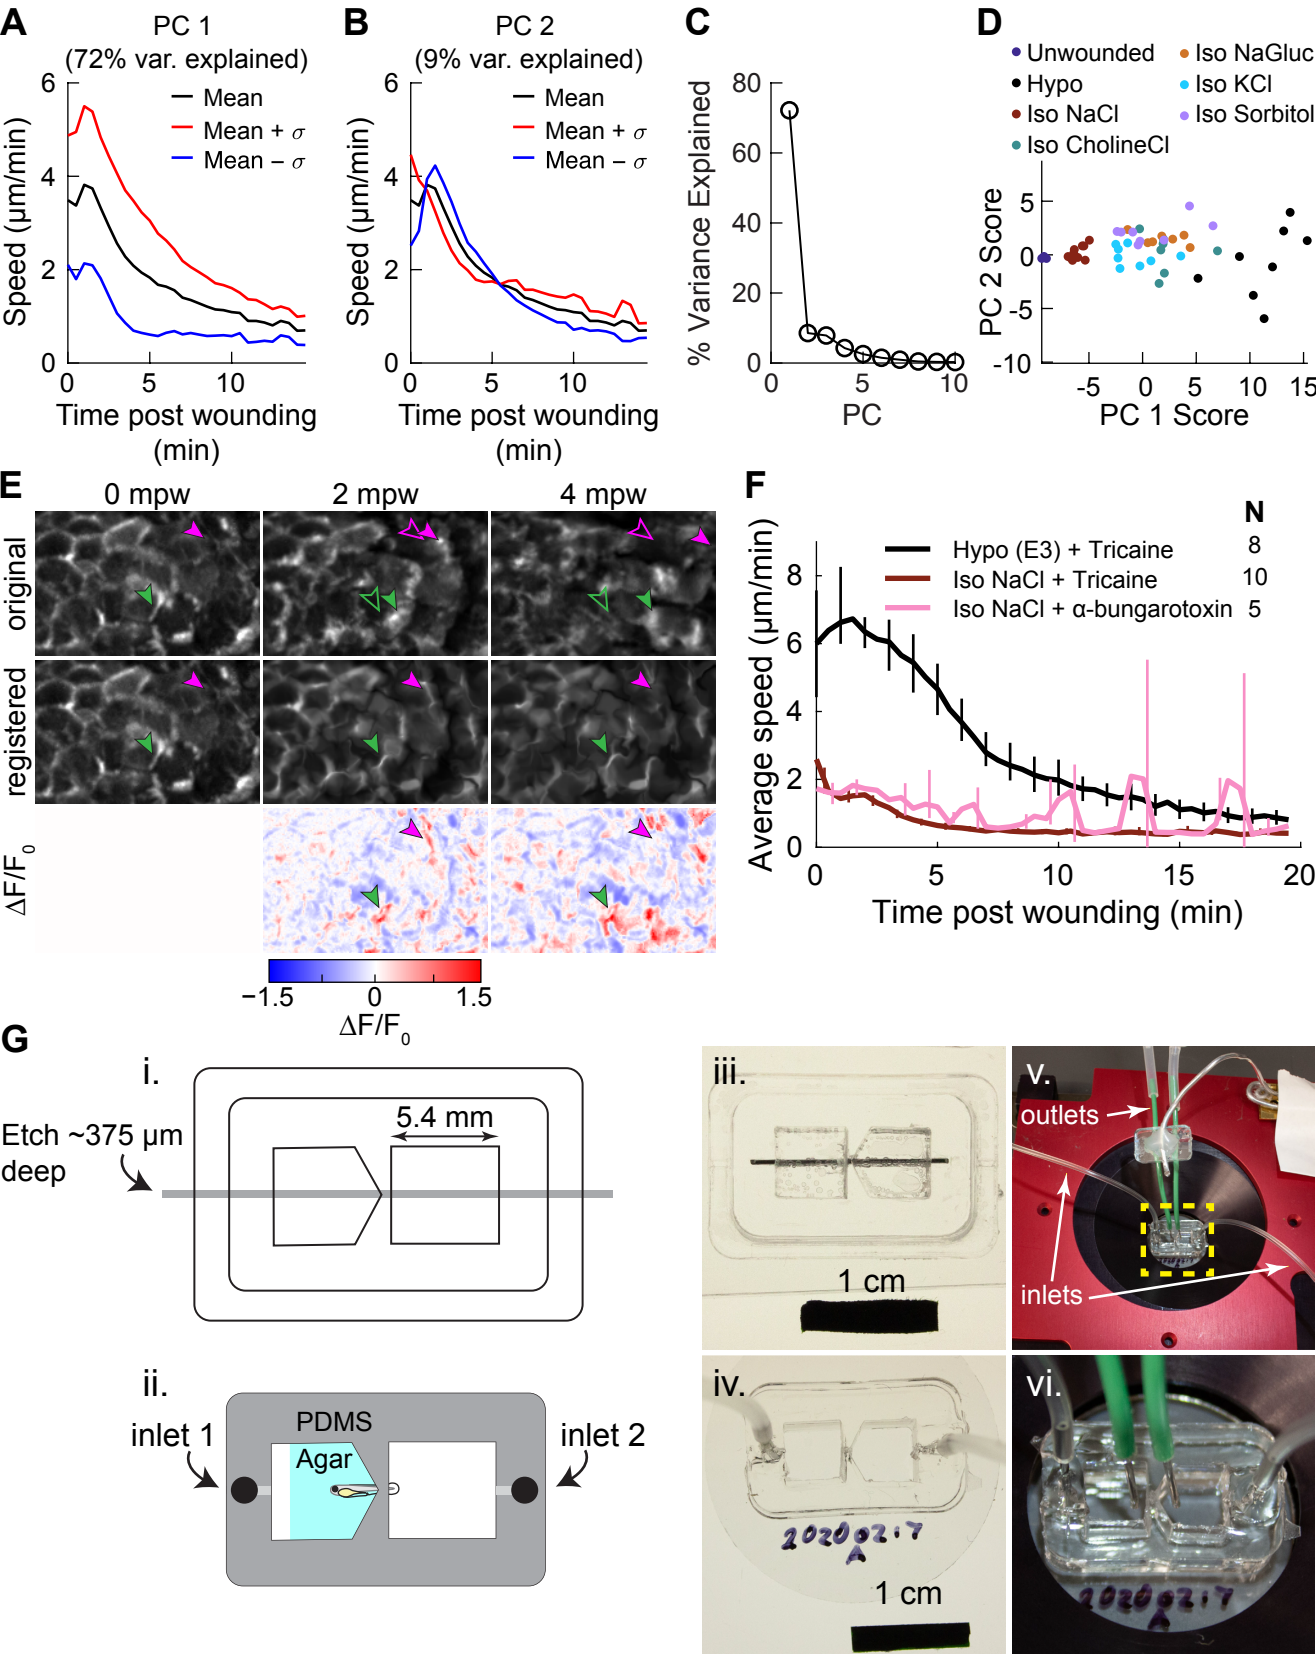

Figure 2 - figure supplement 1

Supplement: supp [file elife-62386-supp-v1.zip]
